# Supplementary material for: Factors Associated with False Negative Results in Serum Pepsinogen Testing for Precancerous Gastric Lesions in a European Population in the GISTAR Study
Source: MDPI journal article supplement (doi:10.3390/diagnostics12051166), 2022-05-07
Supplement: s1 [file s1]

## Supplementary Materials

Table S1. Multivariable regression model for false negative cases in detecting precancerous gastric lesions with pepsinogen testing (n=293)

| Variables, n (%)                         | OR   | 95% CI      | p – value |
|------------------------------------------|------|-------------|-----------|
| Sex (male)                               | 0.94 | 0.51-1.74   | 0.85      |
| Age (years)                              | 1.01 | 0.97 – 1.05 | 0.77      |
| Income (Euros) <sup>a</sup>              | ref  |             |           |
| <250                                     | 0.58 | 0.33 – 1.01 | 0.05      |
| 250-500                                  | 0.57 | 0.24 – 1.39 | 0.22      |
| >500                                     |      |             |           |
| Never smokers                            | Ref  |             |           |
| Former smokers                           | 1.07 | 0.51-2.25   | 0.86      |
| Current smokers                          | 3.22 | 1.57-6.58   | <0.01     |
| Alcohol (per 10g increase/week)          | 1.07 | 1.01-1.14   | 0.03      |
| At least 400g fruit and vegetables daily | 1.03 | 0.60-1.75   | 0.93      |
| Onion and spring onion                   |      |             |           |
| once a week                              | Ref  |             |           |
| 2-4 times per week                       | 1.62 | 0.72-3.64   | 0.24      |
| 5-6 times per week                       | 0.90 | 0.38-2.14   | 0.81      |
| every day                                | 1.43 | 0.57-3.58   | 0.45      |
| Coffee                                   |      |             |           |
| once a week                              | Ref  |             |           |
| 2-6 times per week                       | 0.65 | 0.26-1.63   | 0.36      |
| every day                                | 0.77 | 0.36-1.67   | 0.51      |
| BMI                                      | 0.99 | 0.70-1.39   | 0.93      |
| <i>H. pylori</i> positive (biopsy)       | 2.54 | 1.50-4.28   | <0.01     |
| PPI use previous month                   | 1.05 | 0.40-2.76   | 0.93      |

The false negative group (FN) was compared against the true positive (TP) group.

<sup>a</sup> monthly household income per household member after tax.

OR – odds ratio, adjusted for all the factors in the model, CI – confidence interval, IQR – interquartile range, PPI – proton pump inhibitors, ref – reference value.

Table S2. Comparison of median Pg I values by smoking status and *H. pylori* presence for participants with and without precancerous gastric lesions

|                     | No precancerous lesions<br>PgI ng/mL median, IQR |                              | p<br>value* | Precancerous lesions<br>PgI ng/mL median, IQR |                              | p value* |
|---------------------|--------------------------------------------------|------------------------------|-------------|-----------------------------------------------|------------------------------|----------|
|                     | <i>H. pylori</i><br>positive                     | <i>H. pylori</i><br>negative |             | <i>H. pylori</i><br>positive                  | <i>H. pylori</i><br>negative |          |
| study<br>population | 51.51 IQR<br>26.7                                | 37.87 IQR<br>19.31           | <0.000<br>1 | 30.28 IQR<br>34.69                            | 8.59 IQR<br>20.63            | <0.0001  |
| never<br>smokers    | 51.48 IQR<br>26.58                               | 35.13 IQR<br>17.28           | <0.000<br>1 | 26.32 IQR<br>33.45                            | 7.22 IQR<br>14.13            | <0.0001  |
| former<br>smokers   | 53.14 IQR<br>27.55                               | 40.41 IQR<br>17.04           | <0.000<br>1 | 30.11 IQR<br>38.92                            | 8.7 IQR<br>8.88              | <0.0001  |
| current<br>smokers  | 50.99 IQR<br>25.21                               | 46.08 IQR<br>18.83           | 0.04        | 40.47<br>IQR 38.54                            | 34.34 IQR<br>33.69           | 0.12     |

\*Differences obtained using Mann-Whitney U test to compare *H. pylori* positive and negative groups. IQR – interquartile range.
